# Supplementary material
Source: Springer Nature journal article supplement (https://www.springermedizin.de/resource/supplementary/12882_2012_415_MOESM2_ESM.pdf/9453528)

**A**

(mmol/l)

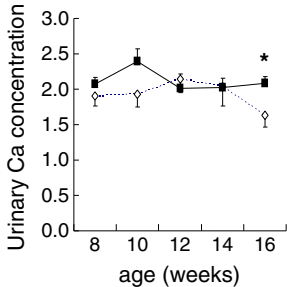**B**

(mmol/day)

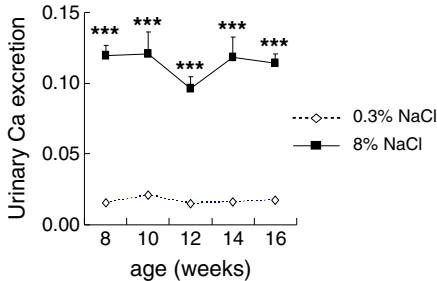

Supplement: MOESM2 [file 9453528]
